# Supplementary material for: Characterization of thealgCGene Expression Pattern in the Multidrug ResistantAcinetobacter baumanniiAIIMS 7 and Correlation with Biofilm Development on Abiotic Surface
Source: Hindawi journal article supplement (doi:10.1155/2014/593546), 2014-01-01
Supplement: f1 [file 593546.f1.pdf]

## Legends for Supplementary Tables and Figures

### Table S1 Interactions of metal ion ( $Mg^{2+}$ ) with *A. baumannii* AIIMS 7 PMM residues

#### Fig. S1 Amplification of *algC* from genome of *A. baumannii* AIIMS 7

Lane M: Molecular weight marker (in kb); lane 1: *algC* gene (1781 bp) amplified from genomic DNA; Lane 2: Negative PCR control (DNase, RNase free water)

#### Fig.S2 Amplification of internal coding regions of cDNA of *algC* by RT-PCR assay

Lane M: Molecular weight marker (in kb), lane 1: coding region 1 (463 bp); lane2: coding region 2 (1360 bp) amplified from cDNA; Lane 3: Negative PCR control (total RNA used as template for direct PCR)

#### Fig. S3 Promoter region of *algC* gene

*algC* transcription initiation site and the direction of transcription are indicated by the large, bold type and the black curved arrow, respectively. The predicted matching -10 (GATAGA) and -35 (TTGAATA) promoter regions and a putative RBS (highlighted in grey) are also shown. The black horizontal arrow identifies the *algC* initiation codon.

#### Fig. S4 CLUSTALW alignment of target and template sequences used for 3-D model building

Alignment of target PMM/PGM sequence(AEC46864) from *A. baumannii* AIIMS 7 with template sequence (1K2Y) from *P. aeruginosa* PMM/PGM S108A mutant. Respective colored regions show: metal binding residues, Ser104(domain 1, Green), Asp244, Asp246, Asp248 (domain 2, Pink);sugar binding residues, Glu327, Ala329, His331 (domain 3, Yellow); phosphate binding residues: Lys287 (domain 3, yellow), Arg 427, Arg 438 (domain 4, Blue)

## SUPPLEMENTARY TABLES & FIGURES

Suppl. Table S1 Interactions of metal ion ( $\text{Mg}^{2+}$ ) with *A. baumannii* AIIMS 7 PMM residues

| S.No | Residues           | Distance in Å |
|------|--------------------|---------------|
| 1    | SER 104 OG ---- Mg | 2.006         |
| 2    | ASP 244 OD2 ----Mg | 2.214         |
| 3    | ASP 244 OD1 ----Mg | 2.032         |
| 4    | ASP 248 OD1 ----Mg | 2.060         |
| 5    | ASP 248 OD2 ----Mg | 2.138         |
| 6    | ASP 246 OD2 ----Mg | 2.057         |
| 7    | ASP 246 OD1 ----Mg | 2.051         |

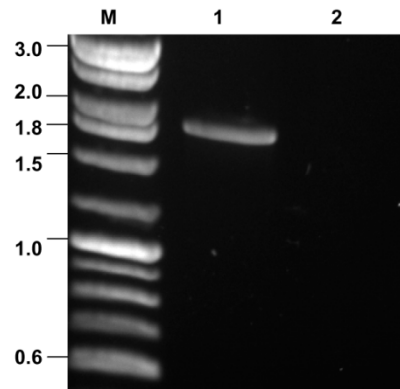

**Suppl. Fig. S1 Amplification of *algC* from genome of *A. baumannii* AIIMS 7**

Lane M: Molecular weight marker (in kb); lane 1: *algC* gene (1781 bp) amplified from genomic DNA; Lane 2: Negative PCR control (DNase, RNase free water)

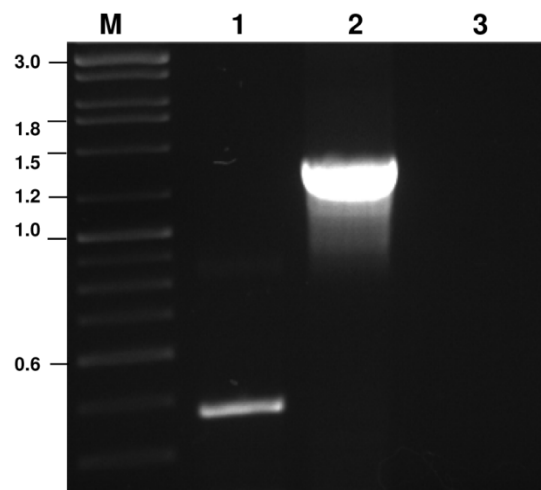

**Suppl. Fig.S2 Amplification of internal coding regions of cDNA of *algC* by RT-PCR assay**

Lane M: Molecular weight marker (in kb), lane 1: coding region 1 (463 bp); lane2: coding region 2 (1360 bp) amplified from cDNA; Lane 3: Negative PCR control (total RNA used as template for direct PCR)

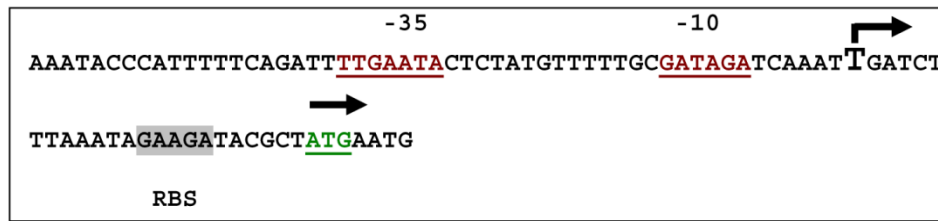

### Suppl. Fig. S3 Promoter region of *algC* gene

*algC* transcription initiation site and the direction of transcription are indicated by the large, bold type and the black curved arrow, respectively. The predicted matching -10 (GATAGA) and -35 (TTGAATA) promoter regions and a putative RBS (highlighted in grey) are also shown. The black horizontal arrow identifies the *algC* initiation codon.

CLUSTAL 2.0.11 multiple sequence alignment

```

gi|330858329|gb|AEC46864.1|  --MNVRSFSPKNIFRAYDIRGKLS-YLTTDVVRSIAYGLAQYKQAEQTQ 47
1K2Y_X|PDBID|CHAIN|SEQUENCE MSTAKAPTLPASIFRAYDIRGVGDTLTAETAYWIGRAIGSES LARGEPC 50
                               ::* .***** :. **:.. *. :... :.

gi|330858329|gb|AEC46864.1|  LIIGYDARLTSPAYAHLEIEILVEQGLNVTNIGCCSTPMYYIAREFGG- 96
1K2Y_X|PDBID|CHAIN|SEQUENCE VAVGRDGRLSGPVLVKLIQGLVDCGCQVSDVGMVPTPVLYYAANVLEGG 100
                               ::* .**.*. :. : : **: * :*::** .**::** * . : *

gi|330858329|gb|AEC46864.1|  NGIMVTAHNPKSDNGIKWILRGEPPSPEMIQQVGEFAQTYVPHTHTISLL 146
1K2Y_X|PDBID|CHAIN|SEQUENCE SGVMLTGAHNPPDYNGFKIVVAGETLANEQIQLRERIEKNDLASGVGSV 150
                               .**::**.*. :*:* :. **: : * ** : * :. : : :

gi|330858329|gb|AEC46864.1|  ELSTPQFNSEFCKKYQQAIFNDIQLKRPLKVVL DGLHGSAGHCSKLVLEK 196
1K2Y_X|PDBID|CHAIN|SEQUENCE EQ-----VDILPRYFKQIRDDIAMAKPMKVVD CGNGVAGVIA PQLIEA 194
                               * :. : * : * ** : :*:**.* : * ** : :.*

gi|330858329|gb|AEC46864.1|  MGCEVIALRTTPNGEFPDHAPDP SHAHLKELRKTIIEQGADIGIALDGD 246
1K2Y_X|PDBID|CHAIN|SEQUENCE LGCSVIPLYCEVDGNFPNHPDPGKPENLKDLIAKVKAENADLGLAFDGD 244
                               :**.*.* :*:*.* ***. :. :*:** :. : .**.*:***

gi|330858329|gb|AEC46864.1|  GDRVVLLDEKANILTADRLLSLFAQMCLEQQPDKEIVFDVKCSLMVQRTV 296
1K2Y_X|PDBID|CHAIN|SEQUENCE GDRVGVVTNTGTIIYPDRLLMLFAKD VVSRNPGADII FDVKCTRRLIALI 294
                               **** :. :...* .***** ***: :...* .:*****: : :

gi|330858329|gb|AEC46864.1|  ERLGKPKMIRTGSSFLRAYLSQSNGNAIFGGEYAGHYVFN DGRGFGYDD 346
1K2Y_X|PDBID|CHAIN|SEQUENCE SGYGRPVVMWKTGHS LIKKMKETG--ALLAGEMSGHVFFKER-WFGFDD 341
                               . **:* * :** *:: :...* :...** :** .*: : **:*

gi|330858329|gb|AEC46864.1|  GLYAALRVMEYFTESSATTISDLFSNPERCCTEDTYIGTHQSDPKHVLQ 396
1K2Y_X|PDBID|CHAIN|SEQUENCE GIYSAARLLEILSQDQDSE-HVFSAFP SDISTPEINITVTEDSKFAIIE 390
                               *:*.* **:* :...* :. :**.*. . * . * . : :

gi|330858329|gb|AEC46864.1|  DIEILSHRLGARISKIDGVRLDFDDGFGIIRASNTGEYFTVRF DADNPLR 446
1K2Y_X|PDBID|CHAIN|SEQUENCE ALQRDAQWGE GNITLDGVRVDYPKGWGLVRASNTTPVLVLRFEADTEEE 440
                               :. :. :*::*****.* :*::***** :*::**.*.

gi|330858329|gb|AEC46864.1|  LKEIQQKFIDMLQERYPQIAQELMSL 472
1K2Y_X|PDBID|CHAIN|SEQUENCE LERIKTVFRNQLKAVDSSLVPVF-- 463
                               *:.*: * : * : :... :

```

**Suppl. Fig. S4 CLUSTALW alignment of target and template sequences used for 3-D model building**

Alignment of target PMM/PGM sequence(AEC46864) from *A. baumannii* AIIMS 7 with template sequence (1K2Y) from *P. aeruginosa* PMM/PGM S108A mutant. Respective colored regions show: metal binding residues, Ser104(domain 1, Green), Asp244, Asp246, Asp248 (domain 2, Pink);sugar binding residues, Glu327, Ala329, His331 (domain 3, Yellow); phosphate binding residues: Lys287 (domain 3, yellow), Arg 427, Arg 438 (domain 4, Blue)
